# Supplementary material for: Phospholipid turnover and acyl chain remodeling in the yeast ER
Source: PubMed Central journal article supplement — Biochim Biophys Acta Mol Cell Biol Lipids. Author manuscript; Available in PMC 2023 Dec 13. (PMC10716787; doi:10.1016/j.bbalip.2019.05.006), 2019-05-27
Supplement: NIHMS1944716-supplement-1.pdf [file NIHMS1944716-supplement-1.pdf]

## **Multiple files are bound together in this PDF Package.**

Adobe recommends using Adobe Reader or Adobe Acrobat version 8 or later to work with documents contained within a PDF Package. By updating to the latest version, you'll enjoy the following benefits:

- Efficient, integrated PDF viewing
- Easy printing
- Quick searches

**Don't have the latest version of Adobe Reader?**

**[Click here to download the latest version of Adobe Reader](#)**

**If you already have Adobe Reader 8,  
click a file in this PDF Package to view it.**
